# Supplementary material for: Dead sands: bioerosion of alien foraminiferal shells in a Mediterranean seagrass meadow
Source: Copernicus journal article supplement (doi:10.5194/bg-2020-452), 2021-01-08
Supplement: Supplementary file [file bg-2020-452-RC2-supplement.pdf]

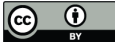

# Dead sands: bioerosion of alien foraminiferal shells in a Mediterranean seagrass meadow

Martin Vohník<sup>1</sup>

<sup>1</sup>Department of Mycorrhizal Symbioses, Institute of Botany, Czech Academy of Sciences, Průhonice, 25243, Czechia

5 Correspondence to: Martin Vohník (vohnik@ibot.cas.cz)

**Abstract.** Foraminiferans are diverse macroscopic protists abundant in (sub) tropical seas, often forming characteristic benthic communities known as “living sands”. Numerous species have migrated through the Suez Canal to the Mediterranean, some turning invasive and gradually outcompeting the indigenous species. The most expansive *Amphistegina lobifera* often creates thick seabed sediments, thus becoming an important environmental engineer. However, little is known about the turnover of its shells in the invaded ecosystems. Using vital staining, stereomicroscopy, scanning electron microscopy, cultivation and DNA fingerprinting, I investigated the vital status, destruction/decomposition and mycobiota of *A. lobifera* in the rhizosphere of the dominant Mediterranean seagrass *Posidonia oceanica* in an underwater Maltese meadow (average 284 shells/g, representing 28.5% of dry substrate weight), in comparison with epiphytic specimens and *P. oceanica* roots. While 78% of the epiphytes were alive, nearly all substrate specimens were dead. On average, 80% of the epiphytes were intact, compared to 21% of the substrate specimens. Abiotic dissolution and mechanical damage played only a minor role, but some bioerosion was detected in 18% and >70% of the epiphytic and substrate specimens, respectively. Few bioerosion traces could be attributed to fungi and the majority probably belonged to photoautotrophs. The seagrass roots displayed fungal colonization typical for this species and yielded 81 identified isolates, while the surface-sterilized substrate specimens surprisingly yielded no cultivable fungi, compared to other 16 identified isolates obtained from the epiphytes. While the epiphytes’ mycobiota was dominated by ascomycetous generalists also known from terrestrial ecosystems (alongside with, e.g., a relative of the “rock-eating” extremophiles), the roots were dominated by the seagrass-specific dark septate endophyte *Posidoniomyces atricolor* and additionally contained a previously unreported lulworthioid mycobiont. In conclusion, at the investigated locality, dead *A. lobifera* shells seem to be regularly bioeroded by endolithic non-fungal organisms, which may counterbalance their accumulation in the seabed substrate.

25

30

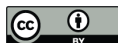

## 1 Introduction

Foraminifera (=forams; SAR: Rhizaria: Retaria, see (Irwin et al., 2019)) are amoeboid eukaryotic protists producing large networks of very thin cytoplasmic extrusions (reticulopodia) and living enclosed in genetically fixed single or multichamber tests (=shells) made of various organic and inorganic materials. With several thousands of recent species, forams represent one of the most diverse groups of marine protist, being found in all marine environments from the tropics to the polar regions, from brackish to hypersaline waters and from the intertidal to the depths of the ocean trenches (e.g., (Pawlowski, 2009); (Altenbach, 2011); (Sabbatini et al., 2014)). Nevertheless, forams are especially abundant in tropical and subtropical seas where their tests form a principal source of calcium carbonate ((Kennett, 1982); (Schiebel, 2002); (Langer, 2008)). Marine forams are both planktonic and benthic; the latter group is significantly more diverse and encompasses larger symbiont-bearing forams forming specific assemblages known as “living sands” that often dominate tropical and subtropical photic seabed substrates (see (Lee and Anderson, 1991) and references therein).

Many (sub-)tropical foraminiferal species have been introduced from the Red Sea through the Suez Canal to the comparably colder Mediterranean Sea (following the so-called Lessepsian route, see (Galil, 2006)), including several larger forams, and while some of them are rather rare, others became important benthic components dominating local foram communities and profoundly changing the structure and type of the invaded habitats, thus acting as “environmental engineers” ((Zenetos et al., 2008); (Yokeş and Meriç, 2009)). Arguably the most abundant alien foram in the Mediterranean Sea is the calcareous symbiont-bearing *Amphistegina lobifera* (Rotaliida: Amphisteginidae, Fig. 1a-c; (Weinmann et al., 2013)). It is widely distributed in the Eastern Mediterranean Basin ((Koukousioura et al., 2010); (Yokes et al., 2014)) and thanks to its high dispersal potential aided by increasing water temperatures ((Guy-Haim et al., 2017); (Prazeres et al., 2020)), it gradually expands westwards, the current distribution limit laying between the coast of southern Tunisia, the Maltese Islands and the Adriatic coast along southern Albania ((Yokes et al., 2007); (Langer and Mouanga, 2016); (El Kateb et al., 2018)). In the Levantine Basin, it often forms very dense populations resulting in seabed sediments up to 80 cm thick that in a way resemble the tropical living sands ((Yokes et al., 2014); Figs 1d and 2a).

While foram ecology, evolution, physiology and taxonomy have attracted significant research attention, comparably less is known about the post-mortem fate of their shells, or more specifically, about the agents causing foram shell degradation/destruction during early burial (cf. (Martin, 1999)). The main abiotic processes (disaggregation, corrosion/dissolution, fragmentation, mechanical abrasion, etc.) have been studied to a larger degree (e.g., (Berger, 1967); (Denne and Sen Gupta, 1989); (Kotler et al., 1992); (Berkeley et al., 2009)) and it is evident that they have profound selective effects on dead foram assemblages. For example, abiotic dissolution especially affects forams with smaller and calcareous tests, thus significantly modifying the composition of the foram sediment/palaeoecological record (“taphonomic bias”, e.g., (Martin and Wright, 1988); (Green et al., 1993); (Murray and Alve, 1999); (Nguyen et al., 2009)). In contrast, the biotic processes (bioerosion, decomposition) have been studied to a lesser extent and mostly at the descriptive level (e.g., (Kloos, 1982); (Nielsen and Nielsen, 2001); (Malumián et al., 2007); (Cherchi et al., 2012); (Frozza et al., 2020)), despite that they



65 may cause impacts similar to the abiotic ones (cf. (Perkins and Halsey, 1971)) and, for example, alleviate the negative impact  
of the accumulation of alien foram shells in the invaded ecosystems (cf. (Yokeş and Meriç, 2009)).

Bioerosion can be defined as the destruction and removal of consolidated substrates (lithic and plant/woody) by the  
action of organisms ((Neumann, 1966); (Bromley, 1992); (Tribollet et al., 2011)) while decomposition as the breaking down  
of dead organic matter by the action of (micro-)organisms (Kothe, 2011). Bioerosion can be divided into bioabrasion (caused  
70 by various grazers), biocorrosion (chemical attack) and boring (various macro- or microborers) ((Neumann, 2008); for  
alternative definitions see (Bromley, 1992) and (Tribollet et al., 2011)). Macro- and microborers constitute the endolithic guild  
of bioeroders, in general represented by soft bodied organisms producing shallow stationary borings in hard substrates  
((Golubic et al., 1981); (Tapanila, 2008)). Microborers comprise extremely small sponges, bryozoans and especially algae,  
cyanobacteria and fungi and from the ecophysiological perspective, they can be divided into autotrophs and heterotrophs  
75 ((Bromley, 1992); (Tapanila, 2008)). With a few exceptions (like fungi seeking and utilizing organic skeletal matrix and  
subsequently resting in the resulting borings, see (Warme, 1975)), boring activities are typically connected with creating a  
living space/shelter in a hard substrate (Schönberg and Wisshak, 2014) while during decomposition, the respective organisms  
obtain food (i.e., source of carbon, energy, etc.) from various organic substrates. For historical and practical reasons, bioerosion  
and decomposition have been typically studied by different research communities (palaeontologists and biogeologists vs.  
80 biologists of different specializations) that use different methodological approaches (for bioerosion, see (Golubić et al., 1970);  
(Hirsch et al., 1995); (Wisshak and Tapanila, 2008); (Golubic et al., 2019); (Heřmanová et al., 2020) and many others).

Fungi commonly colonize both abiotic and biotic (both living and dead) substrates and arguably represent the most  
understudied group of marine bioeroders, despite that they are known from practically all marine habitats (e.g., (Golubić et al.,  
2005); (Gadd, 2011); (Amend et al., 2019)). While they may be the dominant microborers in the aphotic zone, they are also  
85 quite common in shallower depths where they colonize various biotic substrates like carapaces of crustaceans, shells of  
molluscs, submerged driftwood, thalli of calcareous algae, etc. (e.g., (Kohlmeyer, 1969); (Kohlmeyer et al., 2004); (Golubić  
et al., 1975); (Rämä et al., 2014) and many others). Fungal interactions with forams are not very well understood, despite that  
the foram biomass may represent a potentially important trophic resource in many marine ecosystems (cf. (Lipps, 1983); (Lee  
and Anderson, 1991)). The available literature is scarce and most of the studies are observational, without an evidenced  
90 explanation of the nature of the observed interaction. For example, under laboratory conditions, some unidentified fungi were  
observed to colonize and possibly also bioerode shells of *Archaias angulatus* (Miliolida: Soritidae) (Butcher and Steinker,  
1979). Some ascomycetous arenicolous species can colonize dead tropical forams and produce sporocarps inside and on the  
surface of their shells while under laboratory conditions, the shell material may serve as a sole source of nutrients for the  
fruiting fungi ((Kohlmeyer, 1984, 1985)(Kohlmeyer, 1985); (Volkman-Kohlmeyer and Kohlmeyer, 1993); also see Fig. 1A  
95 in (Tokura, 1983)). Finally, (Shroba, 1993) ascribed some taphonomic features observed on the shells of temperate benthic  
forams to fungi, but without a detailed documentation and identification of the responsible microborers.

From the foram point of view, fungi are generally not considered as a part of their diet (cf. (Lee and Anderson, 1991)).  
However, (Langer and Gehring, 1993) proposed that certain small motile epiphytic species that produce organic traces



consisting of sulphated glycosaminoglycans might do so to farm bacteria and fungi for subsequent consumption. In addition,  
100 in the intracellular content of some intertidal benthic forams investigated by (Chronopoulou et al., 2019), there was a high  
relative abundance of fungal DNA (belonging to the members of Saccharomycetes and Exobasidiomycetes), suggesting some  
kind of a potential trophic interaction. While it is difficult to imagine that forams could extracellularly digest or graze intact  
living mycelium, they might feed on the often very minute fungal spores and/or bacteria living in the hyphosphere, as proposed  
for some soil testate amoebae (Vohník et al., 2009, 2011).

105 Fungi are not only decomposers/saprobies, but also engage in various symbiotic interactions along the mutualistic-  
parasitic continuum. In the Mediterranean context, a rather curious fungal symbiosis is that with the roots of the dominant  
seagrass *Posidonia oceanica* (Alismatales: Posidoniaceae). While the first detailed observations upon the root anatomy of the  
seagrass had been published ca. 130 years ago (Sauvageau, 1889), the symbiosis was discovered only recently (Vohník et al.,  
2015). However, since the discovery, it has been reported from every single investigated site in the NW Mediterranean Sea  
110 (Borovec and Vohník, 2018; Vohník et al., 2016, 2017). It is formed by a single ascomycetous mycobiont not known from any  
other host or environment that was very recently described as *Posidoniomyces atricolor* (Pleosporales: Aigialaceae) (Vohník  
et al., 2019). Despite its apparent omnipresence in the whole northern Mediterranean Sea (personal observation) and the fact  
that it morphologically resembles the dark septate endophytic association ubiquitous in the roots of the majority of the  
terrestrial plants (e.g., (Lukešová et al., 2015)), next to nothing is known about its functioning as well as significance for both  
115 the mycobiont and the host seagrass. Nevertheless, besides the dominant *P. atricolor*, some other fungi associate with *P.*  
*oceanica* roots, including *Corollospora maritima* (Microascales: Halosphaeriaceae) (Cuomo et al., 1985), an ascomycete found  
to form sporocarps on the shells of *Amphistegina* sp. from Hawaii (see Fig. 1 in (Kohlmeyer, 1985)).

In January 2017, during a search for the phytomyxid colonizing another Lessepsian migrant from the Red Sea, the  
alien seagrass *Halophila stipulacea* (Alismatales: Hydrocharitaceae, see (Kolátková et al., 2020)), I encountered an abundant  
120 *A. lobifera* population at Balluta Bay, St. Julian's, Malta. At some places, its numerous shells formed layers many centimetres  
thick, evoking a Mediterranean version of the tropical living sands (Fig. 2a). While I had not found any *H. stipulacea*, the site  
was occupied by vigorous patches of *P. oceanica* whose leaves often protruded from the seabed substrate full of *A. lobifera*  
(Fig. 2b).

At places of their high abundance, (Butcher and Steinker, 1979) encouraged studies of factors contributing to foram  
125 bioerosion, because an understanding of the mechanisms of diagenesis of their shells would significantly contribute to  
interpretation of the history of carbonate depositional environments. In addition, (Kohlmeyer, 1985) suggested that  
representatives of the genus *Amphistegina* might be good sources of recent “higher” marine fungi (that colonize and bioerode  
their shells). Hence, I returned to the same place in May 2018, collected samples of *A. lobifera* shells from the rhizosphere of  
the seagrass (and epiphytic specimens + the seagrass roots for comparison) and investigated them using various approaches  
130 (vital staining, stereomicroscopy, light and scanning electron microscopy, fungal isolation and DNA fingerprinting): first, to  
assess the vital status of the *A. lobifera* specimens as well as their frequency in the substrate and second, to address two central  
questions of this study, i.e., 1/ what is the fate of dead *A. lobifera* shells in the *P. oceanica* rhizosphere and 2/ whether the



135 fungi inhabiting the seagrass roots colonize the dead shells, thus contributing to their bioerosion. Since the seagrass roots are tightly coupled with a unique spectrum of marine fungi (see above), I hypothesized that these would be the primary bioeroders of dead *A. lobifera* shells.

## 2 Materials and methods

### 2.1 Sampling

140 Epiphytic specimens of *Amphistegina lobifera*, rhizosphere substrate and roots of the seagrass *Posidonia oceanica* were collected using scuba diving at three different microsites (ca. 10 m apart) at a depth of ca. 6 m at Balluta Bay, St. Julian's, Malta (GPS: N35.915685, E14.495578) on 28<sup>th</sup> May 2018. The epiphytic specimens were collected from *P. oceanica* leaves and seaweeds growing in the immediate vicinity of the seagrass (Fig. 2c, d) and the substrate containing *A. lobifera* specimens (volume ca. 50 ml) from the seagrass rhizosphere. All samples were divided in two sub-samples of equal volume, one for (stereo-)microscopic screening and one for mycobiont isolation, and processed as described below.

### 2.2 Screening of *Amphistegina* shells and *Posidonia* roots

145 The sub-samples containing *A. lobifera* shells were further divided into halves; one half was stained for two weeks with rose Bengal, washed repeatedly with tap water and dried to distinguish alive and dead specimens (Walton, 1952) while the other half was dried and used for counting (to establish the abundance of *A. lobifera* specimens in 1 g of the dried substrate), weighting (the total weight of *A. lobifera* specimens in 1 g of the dried substrate), measuring (the diameter of the substrate specimens) and (stereo-)microscopy (to document bioerosion/colonization, dissolution and mechanical damage of the epiphytic + substrate specimens). To measure the diameter of the substrate specimens, random 100 mg of substrate shells per each microsite were separated and the measurements were performed on all shells occurring in three separate fields of view using an Olympus SZX12 stereomicroscope (magnification 12.5×) and the QuickPHOTO MICRO ver. 3.2 software (Promicra, 150 Czechia).

To document bioerosion/colonization, the respective shells were first roughly screened using the stereomicroscope and subsequently, 30 random shells per type and microsite were assessed using a FEI Quanta 200 ESEM scanning electron microscope (FEI Company, USA) in the Low Vacuum mode at room temperature (detailed SEM screening is a lengthy process so the total number of screened shells was primarily limited by the working time available at the SEM microscope). With respect to bioerosion/dissolution, they were sorted out into six qualitative categories, i.e., 1/ intact (=not affected, Fig. 1), 2/ non-bioeroded but partially dissolved, 3/ bioeroded and partially dissolved, 4/ only bioeroded – low level, 5/ only bioeroded – 160 intermediate level and 6/ only bioeroded – high level (of bioerosion). Additionally, surface colonization by macroepiphytes and mechanical damage were recorded (independently of the former six categories) (for illustration see Fig. 3). I did not attempt to determine the respective microborers taxonomically; instead, they were conservatively distinguished into two classes, i.e., fungi and non-fungal organisms. Because the traditional sorting based on the diameter of the borings (e.g., (Perkins and Halsey,



1971)) is not very reliable (see (Golubić et al., 1975)), the borings were assigned to the former class only when intact hyphae  
165 were first observed on the shell surface using a stereomicroscope (for illustration see Fig. 4).

Random *P. oceanica* root segments from each microsite were screened for fungal colonization using a compound  
Olympus BX60 microscope at high magnifications (400× and 1000×) as detailed in (Vohník et al., 2015). In brief, the fine  
terminal roots were separated from the root system, washed with tap water, their transversal and longitudinal semi-thin sections  
were prepared using a razor blade and these were mounted in lactoglycerol in glass slides and evaluated for fungal colonization  
170 using the compound microscope.

Stereomicroscopy and light microscopy photographs were taken with an Olympus DP70 camera, the Deep Focus  
Mode embedded in QuickPHOTO MICRO ver. 3.2 was employed when needed. The obtained photos were modified for clarity  
and contrast as needed and assembled into Figures using Paint.net ver. 4.0.13 (dotPDN LLC, Rick Brewster and contributors).

### 2.3 Mycobiont isolation and identification

175 The protocol for isolation and identification of fungi colonizing *A. lobifera* shells and *P. oceanica* terminal roots comprised  
methods identical to those described in more detail in (Vohník, 2020); this paper also describes their rationale and intuitive  
troubleshooting. In brief, the low-carbon potato carrot agar (PCA) used for mycobiont isolation was prepared by boiling 40 g  
of carrots and 40 g of potatoes separately in 500 ml of deionized water for 5 min. The resulting broth was autoclaved at 121°C  
for 20 min, diluted 1:1 with sterile deionized water, supplemented with agar (10 g/l; HiMedia, India), again autoclaved at  
180 121°C for 20 min and when cooled but still liquid, it was supplemented with Novobiocin sodium salt (50 mg/l; Sigma-Aldrich,  
Germany) to prevent growth of bacteria. The medium was poured into plastic square 25-compartment Petri dishes and left to  
solidify under UV light overnight.

50 epiphytic and 50 substrate shells and 50 root segments (ca. 3–4 mm long) were selected randomly from the samples  
from all three microsites. The shells and the root segments were surface-sterilized 30 s in 10% SAVO (common household  
185 bleach; Unilever, Czechia; 100% SAVO contains 47 g kg<sup>-1</sup>, i.e., 4.7% sodium hypochlorite = NaClO), 3x washed with sterile  
deionized water and then transferred onto the surface of the solidified medium in the dishes. Additionally, 25 substrate shells  
from one microsite were not surface-sterilized but only serially washed with sterile deionized water and then treated as above,  
serving as a control treatment. The isolations took place during the day of collection. Petri dishes with the shells and root  
segments were incubated at room temperature in the dark and periodically checked for fungal growth. After six months, all  
190 visible fungal cultures were counted, assigned codes and identified as detailed below. As *Posidonomyces atricolor*, the  
dominant root mycobiont of *Posidonia oceanica*, is notoriously slow-growing (Vohník et al., 2019), the dishes were re-  
examined after another five months and all new cultures were counted, assigned codes and identified as detailed below.

For mycobiont molecular identification, total DNA was extracted from all fungal cultures producing enough  
mycelium using an Extract-N-Amp Plant Kit (Sigma-Aldrich, Germany) following manufacturer's instructions. The ITS1-  
195 5.8S-ITS2 region (ITS) of the nuclear ribosomal DNA (nrDNA) was amplified using the ITS1F + ITS4 primer pair and the  
partial large subunit (LSU) nrDNA of some isolates was amplified using the LR0R + LR7 primer pair. The PCR and gel



electrophoresis parameters were the same as in (Vohník et al., 2016). The PCR products were purified and sequenced in the MacroGen Europe Laboratory (MacroGen Europe, The Netherlands) using the ITS1, ITS4, LR0R and LR7 primers.

200 The obtained sequences were screened in Finch TV v1.4.0 (<https://digitalworldbiology.com/FinchTV>) for possible machine errors and manually edited/trimmed. Where available, the reverse sequences (i.e., those obtained with the ITS4 and LR7 primers) were converted to reverse complement sequences and aligned with the corresponding forward sequences, yielding consensus sequences (contigs) representing the respective fungal isolates. The resulting ITS sequences were subsequently subjected to BLAST searches in GenBank and those not belonging to *Posidoniomyces atricolor* were aligned in ClustalW (Thompson et al., 1994) implemented in BioEdit v7.2.5 (Hall, 1999). The resulting alignment was used as a matrix  
205 for a neighbour joining (NJ) analysis (default settings) in TOPALi v2.5 (Biomathematics & Statistics Scotland, [www.topali.org](http://www.topali.org)) to delimit molecular operational taxonomic units (MOTUs); the threshold limit for grouping of sequences was set at 99%. One MOTU (#14) was delimited based on the only available LSU sequences. Sequences within separate MOTUs were further aligned to screen their heterogeneity and their taxonomic position was checked using Blast Tree View (NJ, default settings). Fungal taxonomy follows the MycoBank Database (<http://www.mycobank.org/>, accessed during June-  
210 October 2020).

### 3 Results

#### 3.1 Screening of *Amphistegina* shells and *Posidonia* roots

On average, 78.1% of the epiphytic *A. lobifera* specimens were alive (averages for the three microsites: 53.7, 83.3 and 97.4%). In contrast, a great majority (>99%) of the substrate specimens from all three microsites were dead. On average, there were  
215 284 specimens in one gram of the dried substrate (395, 282 and 175 shells), representing on average 28.5% of the total weight of the dried substrate (43.1, 26.5 and 15.8%). The average diameter of the substrate shells was  $1.32 \pm 0.23$  mm (mean + SD; min. 0.52, max. 2.08 mm).

On average, 80% of the epiphytic *A. lobifera* shells were intact (i.e., showed no signs of biotic or abiotic degradation), compared to only 21% of the substrate shells. Only abiotic dissolution was observed in just a few shells (2% and 8%,  
220 respectively). Whereas some degree of bioerosion was observed on average only in 18% of the epiphytic shells, it was >70% in the case of the substrate shells. Highly bioeroded were on average 3% of the epiphytic shells, compared to 13% of the substrate shells (for details see Table 1, for examples see Fig. 3). Only a minor part of the bioerosion traces could be unambiguously attributed to fungi, typically only in a combination of stereomicroscopy followed by SEM (Fig. 4).

All screened root segments displayed the dark septate endophytic colonization typical for *P. oceanica* collected in the  
225 NW Mediterranean Sea (Fig. 5a) that has been documented in terms of morphology, anatomy and ultrastructure in several recent papers (see above).



### 3.2 Mycobiont isolation and identification

In total, 107 fungal isolates were obtained from the 150 surface-sterilized *P. oceanica* root segments (86 isolates; ca. 57% isolation success) and the 150 epiphytic (19; ca. 13%) and the 25 non-sterilized substrate (2; ca. 8%) shells of *A. lobifera*. The 150 surface-sterilized *A. lobifera* shells yielded no isolate. Out of these, 97 were identified with the aid of molecular fingerprinting (Table 2) and they belonged to 14 distinct MOTUs (Table 3). While the epiphytic shells yielded 12 MOTUs that were mostly represented by a single isolate (max. two), the root segments yielded two other MOTUs represented by 67 and 14 morphologically distinct isolates (Fig. 5b). There were no overlaps between the shell- and root-associated MOTUs (Table 3). The epiphytic shell mycobiota comprised generalists like *Alternaria*, *Cladosporium* and *Penicillium* spp., known also from terrestrial ecosystems, alongside with one isolate probably representing a new species in the genus *Knufia* and four MOTUs that could be reliably identified only at the class level. The root mycobiota was at all three microsites dominated by *P. atricolor* whose compact blackish slow growing colonies (Fig. 5b, c) appeared to develop from intraradical (micro-)sclerotia (Fig. 5d). However, at one microsite, the root segments also yielded a previously unreported lulworthioid mycobiont (MOTU 14) probably representing a new species in the Lulworthiales (Table 3).

## 4 Discussion

This study took place at the current NW distribution limit of the alien foram *Amphistegina lobifera* in the Western Basin of the Mediterranean Sea, yet the abundance of its shells in the seabed substrate was comparable with or even exceeded those reported from the comparably warmer Eastern Basin (average 28.5% reported here vs. 32.7% reported from the Antalya coast in Turkey, see (Yokes et al., 2014); max. 395 shells/g reported here vs. max. 178 shells/g reported from the Israeli coast, see (Hyams et al., 2002). Thus, despite that the thickness of the substrate containing *A. lobifera* shells by far did not reach the impressive 60–80 cm reported by (Yokeş and Meriç, 2009), the alien foram shells did represent a significant part of the bottom sediment at the investigated Maltese locality and profoundly changed the seabed character (i.e., from calcareous rocks combined with mineral sand and pebbles to a homogenous layer with a large proportion formed by the biogenic calcareous matter, see Fig. 2a, b). Interestingly, in contrast to the tropical “living sands”, practically all *A. lobifera* substrate specimens were dead. On the other hand, similar has been reported, e.g., for substrate shells from Key Largo, Florida, USA (Martin and Wright, 1988). The seagrass *Posidonia oceanica* is known to produce “matte”, i.e., an important seabed sediment composed of siliciclastic and biogenic carbonated materials mixed in various ratios with organic matter (mainly *P. oceanica* roots, rhizomes and leaves) that can be several meters thick and thousands of years old (e.g., (Serrano et al., 2012)). From the geobiological point of view, it would be interesting to investigate how the matte formation is influenced by the accumulation of dead *A. lobifera* shells in the seabed substrate.

Investigations of the processes beyond the foram shell breakdown and turnover are important not only because of the information loss and taphonomic bias inherent to the transition from living to dead foram assemblages (e.g., (Martin and Wright, 1988)), but also for a better understanding of the factors limiting the accumulation of alien foram shells in the invaded





ecosystems, e.g., through abiotic dissolution (e.g., (Green et al., 1993)) and bioerosion (e.g., (Cherchi et al., 2012)),  
260 transformation of the shells into lime mud, i.e., the important matrix of both recent and ancient calcareous sediments (e.g.,  
(Debenay et al., 1999)), etc. Here, while the abiotic dissolution and mechanical damage contributed only little, the majority  
(>70%) of the substrate shells showed at least some signs of bioerosion, with 13% being highly bioeroded. This is opposite to,  
e.g., the findings of (Berkeley et al., 2009) who investigated tropical intertidal sediments in north Queensland, Australia and  
concluded that the calcareous test degradation during early burial was primarily driven by dissolution, not bioerosion.  
265 However, the reason(-s) for this difference remain unknown. Nevertheless, the data gathered here suggest that bioerosion may,  
at least to a certain degree, counterbalance the accumulation of alien foram shells in the seabed and thus alleviate the negative  
impact of the alien foram environmental engineering ((Zenetos et al., 2008); (Yokeş and Meriç, 2009)).

Surprisingly, a great majority of the bioerosion traces seemed to belong to non-fungal organisms (probably  
cyanobacteria and/or microscopic algae). Congruently, and in contrast to the main hypotheses, not only the substrate shells did  
270 not share any fungi with the *Posidonia oceanica* roots, they did not yield any cultivable fungi at all. This is an unexpected  
result, because cultivable fungi are ubiquitous in marine ecosystems and regularly colonize calcareous substrates including  
foram shells (cf. (Kohlmeyer, 1969, 1984, 1985)). In addition, the epiphytic shells were colonized by fungal ubiquitous  
generalists as well as specialists and the seagrass roots were regularly colonized by specific symbiotic fungi, including a  
member of the Lulworthiales that comprise common marine ascomycetes, some of them colonizing foram shells (see  
275 (Kohlmeyer et al., 2000)). Nevertheless, a few substrate shells did display apparent signs of fungal colonization by dark septate  
hyphae (Fig. 4) that actually resembled the mycelium of the dominant *P. oceanica* root mycobiont (see below). However, an  
attempt to clone fungal DNA from such shells ended with inconclusive results (data not shown).

The disappearance of cultivable fungi from the substrate shells observed in this study is difficult to explain and one  
can only speculate about its reasons. For example, since most of the substrate specimens were dead, the respective shells were  
280 presumably empty, i.e., without sufficient organic matter to support the fungal growth. However, many marine ascomycetes  
are notoriously slow-growing (i.e., they need little nutrients), including the dominant *P. oceanica* root mycobiont (see (Vohník  
et al., 2019) and references therein) and, e.g., all the foram-associated tropical marine fungi reported by (Kohlmeyer, 1984,  
1985) probably developed on and/or within dead shells. A more likely explanation is allelopathy, a phenomenon common also  
among marine microorganisms (see (Hellio et al., 2000); (Gross, 2003); (Cepas et al., 2019) and many others). Here, the  
285 antagonists could be the (presumably autotrophic) microbioeroders abundant in the substrate shells and/or the fungi inhabiting  
*P. oceanica* roots. Indeed, while numerous cultivable fungi have been recently obtained from nearly all *P. oceanica* tissues,  
they were absent in the apical parts of the leaves that, however, commonly displayed colonization by microscopic  
algae/cyanobacteria (B. Soperová and M. Vohník, unpublished results). In addition, while it is still unknown, e.g., how far can  
reach the mycelium of *P. oceanica* root-symbiotic fungi, it is interesting to note that their diversity is, at least in the NW  
290 Mediterranean Sea, extremely low and dominated by a single mycobiont (Vohník et al., 2016, 2017, 2019). While data from  
other seagrasses are too few to allow any robust comparisons, such dominance is extremely rare both in freshwater aquatic



and terrestrial ecosystems (e.g., (Vandenkoornhuysen et al., 2002)) and may suggest some kind of antagonism between the dominant root mycobiont and other marine fungi.

Also in this study, the seagrass roots were dominated by *P. atricolor*, a pleosporalean fungus not known from any other hosts or environments, and the microscopic observations presented here (Fig. 5c, d) provide further indirect evidence that this mycobiont is responsible for the root colonization pattern ubiquitous in the NW Mediterranean Sea (Fig. 5a, see (Vohník et al., 2015)). The seagrass roots additionally yielded a hitherto unknown lulworthioid mycobiont and the epiphytic shells an isolate with affinities to the genus *Knufia* that comprises highly destructive extremotolerant lithobionts that, e.g., often bioerode Mediterranean historical monuments exposed to outdoor conditions (see (Isola et al., 2016) and references therein). While these isolates represent interesting and potentially important mycobionts and illustrate how little we know about the diversity of marine fungi (see (Gareth Jones, 2011) and references therein), their more detailed taxonomic assignment remained outside the scope and dimensions of this study.

## 5 Conclusions

In the first study focused on the fate of *A. lobifera* during early burial in an invaded ecosystem, I found out that practically all its substrate specimens were dead and regularly bioeroded by presumably photoautotrophic microborers, not marine fungi. Their taxonomic affinities as well as possible antagonistic interactions with the latter remain unknown and beg further investigations. In contrast, the epiphytic *A. lobifera* specimens yielded a relatively diverse spectrum of mycobionts, at least in comparison with the roots of the seagrass *P. oceanica*, which comprised both ubiquitous generalist and specialist well-adapted to bioerode calcareous substrates. The switch from fungi in the epiphytic shells to non-fungal organisms in the substrate shells is curious and deserves elucidation, possibly through a study focusing on allelopathic interactions between these two microborer guilds. Nevertheless, a few substrate shells were indeed colonized by unidentified fungus/fungi with dark mycelium and possible future studies on interactions of forams with fungi may consider focusing on foram specimens more intimately associated with seagrass roots.

*Data availability.* The nrDNA sequences obtained in this study (see Table 3) are publicly available in GenBank at NCBI (MT636935-41, MT636972-84).

*Author contribution.* MV designed the study, organized and performed the sampling on Malta and fungal isolation and identification, analysed the data and wrote the paper.

*Competing interests.* The author declares that he has no conflict of interest.



*Acknowledgments.* This study was supported by the Czech Science Foundation (GAČR 18-05935S) and the Institute of Botany, Czech Academy of Sciences (RVO 67985939). I wish to thank Viktorie Kolátková for introducing me to the world of forams, the assistance during sampling on Malta and the help with assessing the vital status and abundance of *A. lobifera* in the samples investigated in this study. I also thank Zuzana Heřmanová for sharing the micro-CT image (Fig. 1c), Jiří Machač for taking the SEM photos and assembling the figures and Katarína Holcová for leading the Czech Science Foundation project #18-05935S “From past to present: fossil vs. recent marine shelled organisms as a substrate for colonization and bioerosion”.

## References

- 330 Altenbach, A. V.: Foraminifera, in Encyclopedia of Geobiology, edited by J. Reitner and V. Thiel, pp. 393–396, Springer, Dordrecht., 2011.
- Amend, A., Burgaud, G., Cunliffe, M., Edgcomb, V. P., Ettinger, C. L., Gutiérrez, M. H., Heitman, J., Hom, E. F. Y., Ianiri, G., Jones, A. C., Kagami, M., Picard, K. T., Quandt, C. A., Raghukumar, S., Riquelme, M., Stajich, J., Vargas-Muñiz, J., Walker, A. K., Yarden, O. and Gladfelter, A. S.: Fungi in the marine environment: Open questions and unsolved problems, MBio, 10(2), 1–15, doi:10.1128/mBio.01189-18, 2019.
- 335 Berger, W. H.: Foraminiferal ooze: Solution at depths, Science (80-. ), 156(3773), 383–385, doi:10.1126/science.156.3773.383, 1967.
- Berkeley, A., Perry, C. T. and Smithers, S. G.: Taphonomic signatures and patterns of test degradation on tropical, intertidal benthic foraminifera, Mar. Micropaleontol., 73(3–4), 148–163, doi:10.1016/j.marmicro.2009.08.002, 2009.
- 340 Bovec, O. and Vohník, M.: Ontogenetic transition from specialized root hairs to specific root-fungus symbiosis in the dominant Mediterranean seagrass *Posidonia oceanica*, Sci. Rep., 8(1), 1–11, doi:10.1038/s41598-018-28989-4, 2018.
- Bromley, R. G.: Bioerosion: Eating Rocks for Fun and Profit, Short Courses Paleontol., 5, 121–129, doi:10.1017/s2475263000002312, 1992.
- Butcher, W. A. and Steinker, D. C.: Fungal and bacterial degradation of the test of *Archaias angulatus* (foraminifera), Micron (1969), 10(1), 35–36, doi:10.1016/0047-7206(79)90019-0, 1979.
- 345 Cepas, V., López, Y., Gabasa, Y., Martins, C. B., Ferreira, J. D., Correia, M. J., Santos, L. M. A., Oliveira, F., Ramos, V., Reis, M., Castelo-Branco, R., Morais, J., Vasconcelos, V., Probert, I., Guilloud, E., Mehiri, M. and Soto, S. M.: Inhibition of bacterial and fungal biofilm formation by 675 extracts from microalgae and cyanobacteria, Antibiotics, 8(2), 1–12, doi:10.3390/antibiotics8020077, 2019.
- 350 Cherchi, A., Buosi, C., Zuddas, P. and De Giudici, G.: Bioerosion by microbial euendoliths in benthic foraminifera from heavy metal-polluted coastal environments of Portovesme (south-western Sardinia, Italy), Biogeosciences, 9(11), 4607–4620, doi:10.5194/bg-9-4607-2012, 2012.
- Chronopoulou, P.-M., Salonen, I., Bird, C., Reichart, G. J. and Koho, K. A.: Metabarcoding insights into the trophic behavior and identity of intertidal benthic foraminifera, Front. Microbiol., 10(MAY), 1–16, doi:10.3389/fmicb.2019.01169, 2019.



- 355 Cuomo, V., Vanzanella, F., Fresi, E., Cinelli, F. and Mazzella, L.: Fungal flora of *Posidonia oceanica* and its ecological significance, *Trans. Br. Mycol. Soc.*, 84(1), 35–40, doi:10.1016/S0007-1536(85)80217-5, 1985.
- Debenay, J. P., André, J. P. and Lesourd, M.: Production of lime mud by breakdown of foraminiferal tests, *Mar. Geol.*, 157(3–4), 159–170, doi:10.1016/S0025-3227(98)00151-0, 1999.
- Denne, R. A. and Sen Gupta, B. K.: Effects of taphonomy and habitat on the record of benthic foraminifera in modern  
360 sediments, *Palaios*, 4(5), 414–423, doi:10.2307/3514586, 1989.
- Frezza, C. F., Pivel, M. A. G., Suárez-Ibarra, J. Y., Ritter, M. N. and Coimbra, J. C.: Bioerosion on Late Quaternary Planktonic Foraminifera Related to Paleoproductivity in the Western South Atlantic, *Paleoceanogr. Paleoclimatology*, 35(8), doi:10.1029/2020PA003865, 2020.
- Gadd, G. M.: Geomycology, in *Encyclopedia of Geobiology*, edited by J. Reitner and V. Thiel, pp. 416–432, Springer,  
365 Dordrecht., 2011.
- Galil, B. S.: The marine caravan-the suez canal and the erythrean invasion, *Bridg. Divid. Marit. Canals as Invasion Corridors*, 83, 207–300, doi:10.1007/978-1-4020-5047-3\_6, 2006.
- Gareth Jones, E. B.: Are there more marine fungi to be described?, *Bot. Mar.*, 54(4), 343–354, doi:10.1515/BOT.2011.043, 2011.
- 370 Golubic, S., Friedmann, I. and Schneider, J.: The Lithobiontic Ecological Niche, with Special Reference to Microorganisms, *SEPM J. Sediment. Res.*, 51(2), 475–478, doi:10.1306/212F7CB6-2B24-11D7-8648000102C1865D, 1981.
- Golubic, S., Schneider, J., Le Campion-Alsumard, T., Campbell, S. E., Hook, J. E. and Radtke, G.: Approaching microbial bioerosion, *Facies*, 65(3), 1–17, doi:10.1007/s10347-019-0568-1, 2019.
- Golubić, S., Brent, G. and Lecampion, T.: Scanning Electron Microscopy of Endolithic Algae and Fungi Using a Multipurpose  
375 Casting-Embedding Technique, *Lethaia*, 3(2), 203–209, doi:10.1111/j.1502-3931.1970.tb01858.x, 1970.
- Golubić, S., Perkins, R. D. and Lukas, K. J.: Boring Microorganisms and Microborings in Carbonate Substrates, *Study Trace Foss.*, 229–259, doi:10.1007/978-3-642-65923-2\_12, 1975.
- Golubić, S., Radtke, G. and Le Campion-Alsumard, T.: Endolithic fungi in marine ecosystems, *Trends Microbiol.*, 13(5), 229–235, doi:10.1016/j.tim.2005.03.007, 2005.
- 380 Green, M. A., Aller, R. C. and Aller, J. Y.: Carbonate dissolution and temporal abundances of Foraminifera in Long Island Sound sediments, *Limnol. Oceanogr.*, 38(2), 331–345, doi:10.4319/lo.1993.38.2.0331, 1993.
- Gross, E. M.: Allelopathy of Aquatic Autotrophs, *CRC. Crit. Rev. Plant Sci.*, 22(3–4), 313–339, doi:10.1080/713610859, 2003.
- Guy-Haim, T., Hyams-Kaphzan, O., Yeruham, E., Almogi-Labin, A. and Carlton, J. T.: A novel marine bioinvasion vector:  
385 Ichthyochory, live passage through fish, *Limnol. Oceanogr. Lett.*, 2(3), 81–90, doi:10.1002/lo.10039, 2017.
- Hall, T. A.: BioEdit: a user-friendly biological sequence alignment editor and analysis program for Windows 95/98/NT., *Nucleic Acids Symp Ser*, 41, 95–98, 1999.
- Hellio, C., Bremer, G., Pons, A. M., Le Gal, Y. and Bourgougnon, N.: Inhibition of the development of microorganisms



- (bacteria and fungi) by extracts of marine algae from Brittany, France, *Appl. Microbiol. Biotechnol.*, 54(4), 543–549, doi:10.1007/s002530000413, 2000.
- Heřmanová, Z., Bruthansová, J., Holcová, K., Mikuláš, R., Kočová Veselská, M., Kočí, T., Dudák, J. and Vohník, M.: Benefits and limits of x-ray micro-computed tomography for visualization of colonization and bioerosion of shelled organisms, *Palaeontol. Electron.*, 23(2), doi:10.26879/1048, 2020.
- Hirsch, P., Eckhardt, F. E. W. and Palmer, R. J.: Methods for the study of rock-inhabiting microorganisms-A mini review, *J. Microbiol. Methods*, 23(2), 143–167, doi:10.1016/0167-7012(95)00017-F, 1995.
- Hyams, O., Almogi-Labin, A. and Benjamini, C.: Larger foraminifera of the southeastern Mediterranean shallow continental shelf off Israel, *Isr. J. Earth Sci.*, 51(3–4), 169–179, doi:10.1560/QAE1-KTEE-2K2L-QPCH, 2002.
- Irwin, N. A. T., Tikhonenkov, D. V., Hehenberger, E., Mylnikov, A. P., Burki, F. and Keeling, P. J.: Phylogenomics supports the monophyly of the Cercozoa, *Mol. Phylogenet. Evol.*, 130(July), 416–423, doi:10.1016/j.ympev.2018.09.004, 2019.
- Isola, D., Zucconi, L., Onofri, S., Caneva, G., de Hoog, G. S. and Selbmann, L.: Extremotolerant rock inhabiting black fungi from Italian monumental sites, *Fungal Divers.*, 76(1), 75–96, doi:10.1007/s13225-015-0342-9, 2016.
- El Kateb, A., Stalder, C., Stainbank, S., Fentimen, R. and Spezzaferri, S.: The genus *Amphistegina* (Benthic foraminifera): Distribution along the southern Tunisian coast, *BioInvasions Rec.*, 7(4), 391–398, doi:10.3391/bir.2018.7.4.06, 2018.
- Kennett, J. P.: *Marine Geology*, Prentice-Hall, Englewood Cliffs, USA., 1982.
- Kloos, D. P.: Destruction of Tests of the Foraminifer *Sorites-Orbiculus* By Endolithic Microorganisms in a Lagoon on Curacao (Netherlands Antilles), *Geol. En Mijnb.*, 61(2), 201–205, 1982.
- Kohlmeyer, J.: The role of marine fungi in the penetration of calcareous substances, *Integr. Comp. Biol.*, 9(3), 741–746, doi:10.1093/icb/9.3.741, 1969.
- Kohlmeyer, J.: Tropical Marine Fungi, *Mar. Ecol.*, 5(4), 329–378, doi:10.1111/j.1439-0485.1984.tb00130.x, 1984.
- Kohlmeyer, J.: Marine fungi (Ascomycetes) within and on tests of Foraminifera, *Mar. Biol.*, 90(1), 147–149, doi:10.1007/BF00428226, 1985.
- Kohlmeyer, J., Spatafora, J. W. and Volkmann-Kohlmeyer, B.: Lulworthiales, a new order of marine Ascomycota, *Mycologia*, 92(3), 453–458, doi:10.2307/3761504, 2000.
- Kohlmeyer, J., Volkmann-Kohlmeyer, B. and Newell, S. Y.: Marine and estuarine mycelial Eumycota and Oomycota, in *Biodiversity of Fungi: Inventory and Monitoring Methods*, edited by G. M. Mueller, M. S. Foster, and G. F. Bills, pp. 533–545, Elsevier Academic Press, Amsterdam., 2004.
- Kolátková, V., Čepička, I., Hoffman, R. and Vohník, M.: *Marinomyxa* Gen. Nov. Accommodates Gall-Forming Parasites of the Tropical to Subtropical Seagrass Genus *Halophila* and Constitutes a Novel Deep-Branching Lineage Within Phytomyxea (Rhizaria: Endomyxa), *Microb. Ecol.*, doi:10.1007/s00248-020-01615-5, 2020.
- Kothe, E.: Microbial Degradation, in *Encyclopedia of Geobiology*, edited by J. Reitner and V. Thiel, pp. 596–599, Springer, Dordrecht., 2011.
- Kotler, E., Martin, R. E. and Liddell, W. D.: Experimental analysis of abrasion and dissolution resistance of modern reef-



- dwelling foraminifera: implications for the preservation of biogenic carbonate, *Palaios*, 7(3), 244–276, doi:10.2307/3514972, 1992.
- 425 Koukousioura, O., Dimiza, M. D. and Triantaphyllou, M. V.: Alien foraminifers from Greek coastal areas (Aegean Sea, Eastern Mediterranean), *Mediterr. Mar. Sci.*, 11(1), 155–172, doi:10.12681/mms.98, 2010.
- Langer, M. R.: Assessing the contribution of foraminiferan protists to global ocean carbonate production, *J. Eukaryot. Microbiol.*, 55(3), 163–169, doi:10.1111/j.1550-7408.2008.00321.x, 2008.
- Langer, M. R. and Gehring, C. A.: Bacteria farming; a possible feeding strategy of some smaller motile Foraminifera, *J. Foraminifer. Res.*, 23(1), 40–46, doi:10.2113/gsjfr.23.1.40, 1993.
- 430 Langer, M. R. and Mouanga, G. H.: Invasion of amphisteginid foraminifera in the Adriatic Sea, *Biol. Invasions*, 18(5), 1335–1349, doi:10.1007/s10530-016-1070-0, 2016.
- Lee, J. J. and Anderson, R. O.: Symbiosis in Foraminifera, in *Biology of Foraminifera*, edited by J. J. Lee and O. R. Anderson, pp. 157–220, Academic Press, London., 1991.
- 435 Lipps, J. H.: Biotic interactions in benthic Foraminifera., *Biot. Interact. Recent Foss. benthic communities*, 331–376, doi:10.1007/978-1-4757-0740-3\_8, 1983.
- Lukešová, T., Kohout, P., Větrovský, T. and Vohník, M.: The potential of dark septate endophytes to form root symbioses with ectomycorrhizal and ericoid mycorrhizal middle european forest plants, *PLoS One*, 10(4), doi:10.1371/journal.pone.0124752, 2015.
- 440 Malumián, N., Cabrera, M. I. L., Nández, C. and Olivero, E. B.: Bioerosion patterns in cretaceous-cenozoic benthic foraminiferal tests from Patagonia and Tierra del Fuego Island, Argentina, *SEPM Spec. Publ.*, 88(88), 301–308, doi:10.2110/pec.07.88.0301, 2007.
- Martin, R. E.: Taphonomy and temporal resolution of foraminiferal assemblages, in *Modern Foraminifera*, edited by B. K. Sen Gupta, pp. 281–298, Kluwer Academic Publishers, New York., 1999.
- 445 Martin, R. E. and Wright, R. C.: Information loss in the transition from life to death assemblages of foraminifera in back reef environments, Key Largo, Florida., *J. Paleontol.*, 62(3), 399–410, doi:10.1017/s002233600001831x, 1988.
- Murray, J. W. and Alve, E.: Natural dissolution of modern shallow water benthic foraminifera: Taphonomic effects on the palaeoecological record, *Palaeogeogr. Palaeoclimatol. Palaeoecol.*, 146(1–4), 195–209, doi:10.1016/S0031-0182(98)00132-1, 1999.
- 450 Neumann, A. C.: Observations on coastal erosion in Bermuda and measurements of the boring rate of the sponge *Cliona lampa*, *Limnol. Oceanogr.*, 11(1), 92–108, doi:10.4319/lo.1966.11.1.0092, 1966.
- Neumann, A. C.: Foreword, in *Current Developments in Bioerosion*, edited by M. Wisshak and L. Tapanila, pp. V–IX, Springer Berlin Heidelberg, Berlin, Heidelberg. [online] Available from: <http://link.springer.com/10.1007/978-3-540-77598-0>, 2008.
- Nguyen, T. M. P., Petrizzo, M. R. and Speijer, R. P.: Experimental dissolution of a fossil foraminiferal assemblage (Paleocene-  
455 Eocene Thermal Maximum, Dababiya, Egypt): Implications for paleoenvironmental reconstructions, *Mar. Micropaleontol.*, 73(3–4), 241–258, doi:10.1016/j.marmicro.2009.10.005, 2009.



- Nielsen, K. S. S. and Nielsen, J. K.: Bioerosion in Pliocene to late Holocene tests of benthic and planktonic foraminiferans, with a revision of the ichnogenera *Oichnus* and *Tremichnus*, *Ichnos*, 8(2), 99–116, doi:10.1080/10420940109380178, 2001.
- Pawlowski, J.: Foraminifera, in *Encyclopedia of Microbiology*, pp. 646–662, Elsevier., 2009.
- 460 Perkins, R. D. and Halsey, S. D.: Geologic significance of microboring fungi and algae in Carolina shelf sediments, *J. Sediment. Res.*, 41(3), 843–853, doi:10.1306/74D72379-2B21-11D7-8648000102C1865D, 1971.
- Prazeres, M., Morard, R., Roberts, T. E., Doo, S. S., Jompa, J., Schmidt, C., Stuhr, M., Renema, W. and Kucera, M.: High dispersal capacity and biogeographic breaks shape the genetic diversity of a globally distributed reef-dwelling calcifier, *Ecol. Evol.*, 10(12), 5976–5989, doi:10.1002/ece3.6335, 2020.
- 465 Rämä, T., Nordén, J., Davey, M. L., Mathiassen, G. H., Spatafora, J. W. and Kausrud, H.: Fungi ahoy! Diversity on marine wooden substrata in the high North, *Fungal Ecol.*, 8(1), 46–58, doi:10.1016/j.funeco.2013.12.002, 2014.
- Sabbatini, A., Morigi, C., Nardelli, M. P. and Negri, A.: Foraminifera, in *The Mediterranean Sea*, edited by S. Goffredo and Z. Dubinsky, pp. 237–256, Springer Netherlands, Dordrecht., 2014.
- Sauvageau, M. C.: Contribution a l'étude du système mécanique dans la racine des plantes aquatiques les *Zostera*, *Cymodocea*  
470 et *Posidonia*, *J. Bot.*, 1889.
- Schiebel, R.: Planktic foraminiferal sedimentation and the marine calcite budget, *Global Biogeochem. Cycles*, 16(4), 13/1-21, doi:10.1029/2001gb001459, 2002.
- Schönberg, C. H. L. and Wisshak, M.: Marine Bioerosion, in *The Mediterranean Sea*, edited by S. Goffredo and Z. Dubinsky, pp. 449–461, Springer Netherlands, Dordrecht., 2014.
- 475 Serrano, O., Mateo, M. A., Renom, P. and Julià, R.: Characterization of soils beneath a *Posidonia oceanica* meadow, *Geoderma*, 185–186, 26–36, doi:10.1016/j.geoderma.2012.03.020, 2012.
- Shroba, C. S.: Taphonomic features of benthic foraminifera in a temperate setting: experimental and field observations on the role of abrasion, solution and microboring in the destruction of foraminiferal tests, *Palaios*, 8(3), 250–266, doi:10.2307/3515148, 1993.
- 480 Tapanila, L.: The endolithic guild: an ecological framework for residential cavities in hard substrates, in *Current Developments in Bioerosion*, edited by M. Wisshak and L. Tapanila, pp. 3–20, Springer Berlin Heidelberg, Berlin, Heidelberg., 2008.
- Thompson, J. D., Higgins, D. G. and Gibson, T. J.: CLUSTAL W: improving the sensitivity of progressive multiple sequence alignment through sequence weighting, position-specific gap penalties and weight matrix choice, *Nucleic Acids Res.*, 22(22), 4673–4680, doi:10.1093/nar/22.22.4673, 1994.
- 485 Tokura, R.: Marine Fungi with Ascomycetes attached to Grains of Sand from Japanese Beaches II. Kyushu and Nansei Islands, *Bull Kyoto Univ Educ. Ser B*, 62, 27–35, 1983.
- Tribollet, A., Radtke, G. and Golubic, S.: Bioerosion, in *Encyclopedia of Geobiology*, edited by J. Reitner and V. Thiel, pp. 117–134, Springer, Dordrecht., 2011.
- Vandenkoornhuyse, P., Baldauf, S. L., Leyval, C., Straczek, J. and Young, J. P. W.: Extensive fungal diversity in plant roots,  
490 *Science (80-. )*, 295(5562), 2051, doi:10.1126/science.295.5562.2051, 2002.



- Vohník, M.: Ericoid mycorrhizal symbiosis: theoretical background and methods for its comprehensive investigation, *Mycorrhiza*, 30(6), 671–695, doi:10.1007/s00572-020-00989-1, 2020.
- Vohník, M., Burdíková, Z., Albrechtová, J. and Vosátka, M.: Testate amoebae (Arcellinida and Euglyphida) vs. Ericoid mycorrhizal and DSE fungi: A possible novel interaction in the mycorrhizosphere of ericaceous plants?, *Microb. Ecol.*, 57(1), 495 203–214, doi:10.1007/s00248-008-9402-y, 2009.
- Vohník, M., Burdíková, Z., Vyhnaň, A. and Koukol, O.: Interactions Between Testate Amoebae and Saprotrophic Microfungi in a Scots Pine Litter Microcosm, *Microb. Ecol.*, 61(3), 660–668, doi:10.1007/s00248-010-9777-4, 2011.
- Vohník, M., Borovec, O., Župan, I., Vondrášek, D., Petrtyl, M. and Sudová, R.: Anatomically and morphologically unique dark septate endophytic association in the roots of the Mediterranean endemic seagrass *Posidonia oceanica*, *Mycorrhiza*, 25(8), 500 663–672, doi:10.1007/s00572-015-0642-7, 2015.
- Vohník, M., Borovec, O. and Kolařík, M.: Communities of Cultivable Root Mycobionts of the Seagrass *Posidonia oceanica* in the Northwest Mediterranean Sea Are Dominated by a Hitherto Undescribed Pleosporalean Dark Septate Endophyte, *Microb. Ecol.*, 71(2), 442–451, doi:10.1007/s00248-015-0640-5, 2016.
- Vohník, M., Borovec, O., Župan, I., Kolařík, M. and Sudová, R.: Fungal root symbionts of the seagrass *Posidonia oceanica* in 505 the central Adriatic Sea revealed by microscopy, culturing and 454-pyrosequencing, *Mar. Ecol. Prog. Ser.*, 583, 107–120, doi:10.3354/meps12337, 2017.
- Vohník, M., Borovec, O., Kolaříková, Z., Sudová, R. and Réblová, M.: Extensive sampling and high-throughput sequencing reveal *Posidoniomyces atricolor* gen. Et sp. Nov. (Aigialaceae, Pleosporales) as the dominant root mycobiont of the dominant Mediterranean seagrass *Posidonia oceanica*, *MycoKeys*, 55, 59–86, doi:10.3897/mycokeys.55.35682, 2019.
- 510 Volkman-Kohlmeyer, B. and Kohlmeyer, J.: Biogeographic Observations on Pacific Marine Fungi, *Mycologia*, 85(3), 337–346, doi:10.1080/00275514.1993.12026282, 1993.
- Walton, W. R.: Techniques for recognition of living foraminifera, *Contrib. from Cushman Found. Foraminifer. Res.*, 3, 56–60, 1952.
- Warne, J. E.: Borings As Trace Fossils, and the Processes of Marine Bioerosion, *Study Trace Foss.*, 181–227, 515 doi:10.1007/978-3-642-65923-2\_11, 1975.
- Weinmann, A. E., Rödder, D., Lötters, S. and Langer, M. R.: Traveling through time: The past, present and future biogeographic range of the invasive foraminifera *Amphistegina* spp. in the Mediterranean Sea, *Mar. Micropaleontol.*, 105, 30–39, doi:10.1016/j.marmicro.2013.10.002, 2013.
- Wisshak, M. and Tapanila, L.: *Current Developments in Bioerosion*, edited by M. Wisshak and L. Tapanila, Springer Berlin 520 Heidelberg, Berlin, Heidelberg., 2008.
- Yokes, M. B., Meric, E. and Avsar, N.: On the Presence of alien foraminifera *Amphistegina lobifera* Larsen on the coasts of the Maltese Islands, *Aquat. Invasions*, 2(4), 439–441, doi:10.3391/ai.2007.2.4.15, 2007.
- Yokes, M. B., Meriç, E., Avşar, N., Öncel, M. S., Eryilmaz, M. and Barut, I.: The expanded population of *Amphistegina lobifera* at Üç Adalar and Beş Adalar (Antalya, Turkey), *Mar. Biodivers. Rec.*, 7, 1–10, doi:10.1017/S175526721400044X,





525 2014.

Yokeş, M. B. and Meriç, E.: Drowning in the sand: Invasion by Foraminifera, in *Invasive species: Detection, impact and control*, edited by C. P. Wilcox and R. B. Turpin, pp. 7–20, Nova Science Publishers, Hauppauge, USA., 2009.

Zenetos, A., Meric, E., Verlaque, M., Galli, P., Boudouresque, C. F., Giangrande, A., Cinar, M. E. and Bilecenoğlu, M.: Additions to the annotated list of marine alien biota in the Mediterranean with special emphasis on Foraminifera and Parasites,

530 *Mediterr. Mar. Sci.*, 9(1), 119–166, doi:10.12681/mms.146, 2008.

535

540

545

550

555

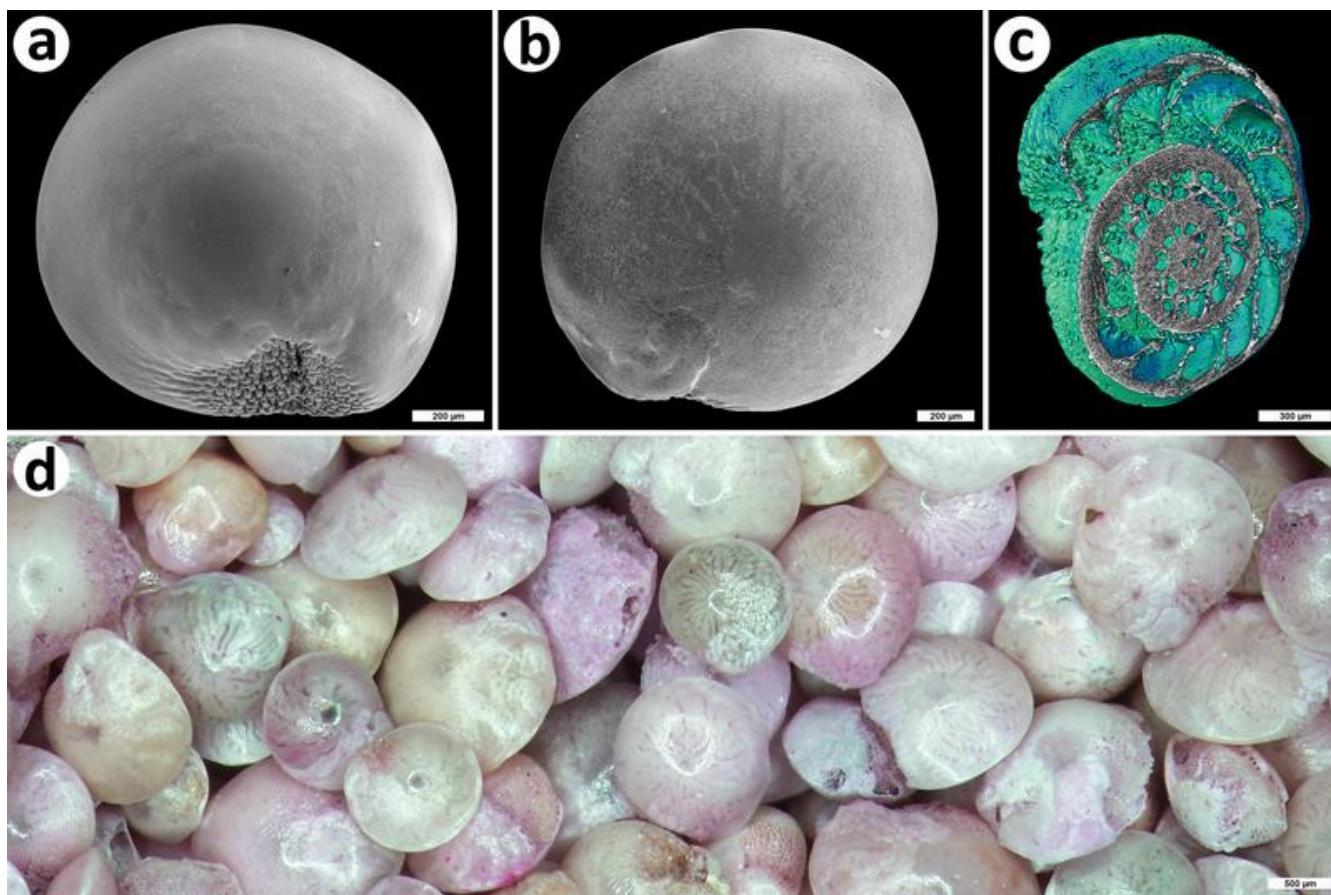

560 **Figure 1: The invasive foraminiferan *Amphistegina lobifera* from Balluta Bay, St. Julian's, Malta.**

(a) ventral view, SEM, bar = 200  $\mu\text{m}$ ; (b) dorsal view, SEM, bar = 200  $\mu\text{m}$ ; (c) micro-CT 3D reconstruction (coloured to contrast inner structure), bar = 300  $\mu\text{m}$ ; (d) magnified view of an *A. lobifera* assemblage (some specimens stained with rose Bengal), bar = 500  $\mu\text{m}$ . The shells collected by Martin Vohník, photos taken by Jiří Machač, Institute of Botany, Czech Academy of Sciences, Průhonice under Martin Vohník's supervision (a, b), Zuzana Heřmanová, National Museum, Prague (c) and Martin Vohník (d).

565

570

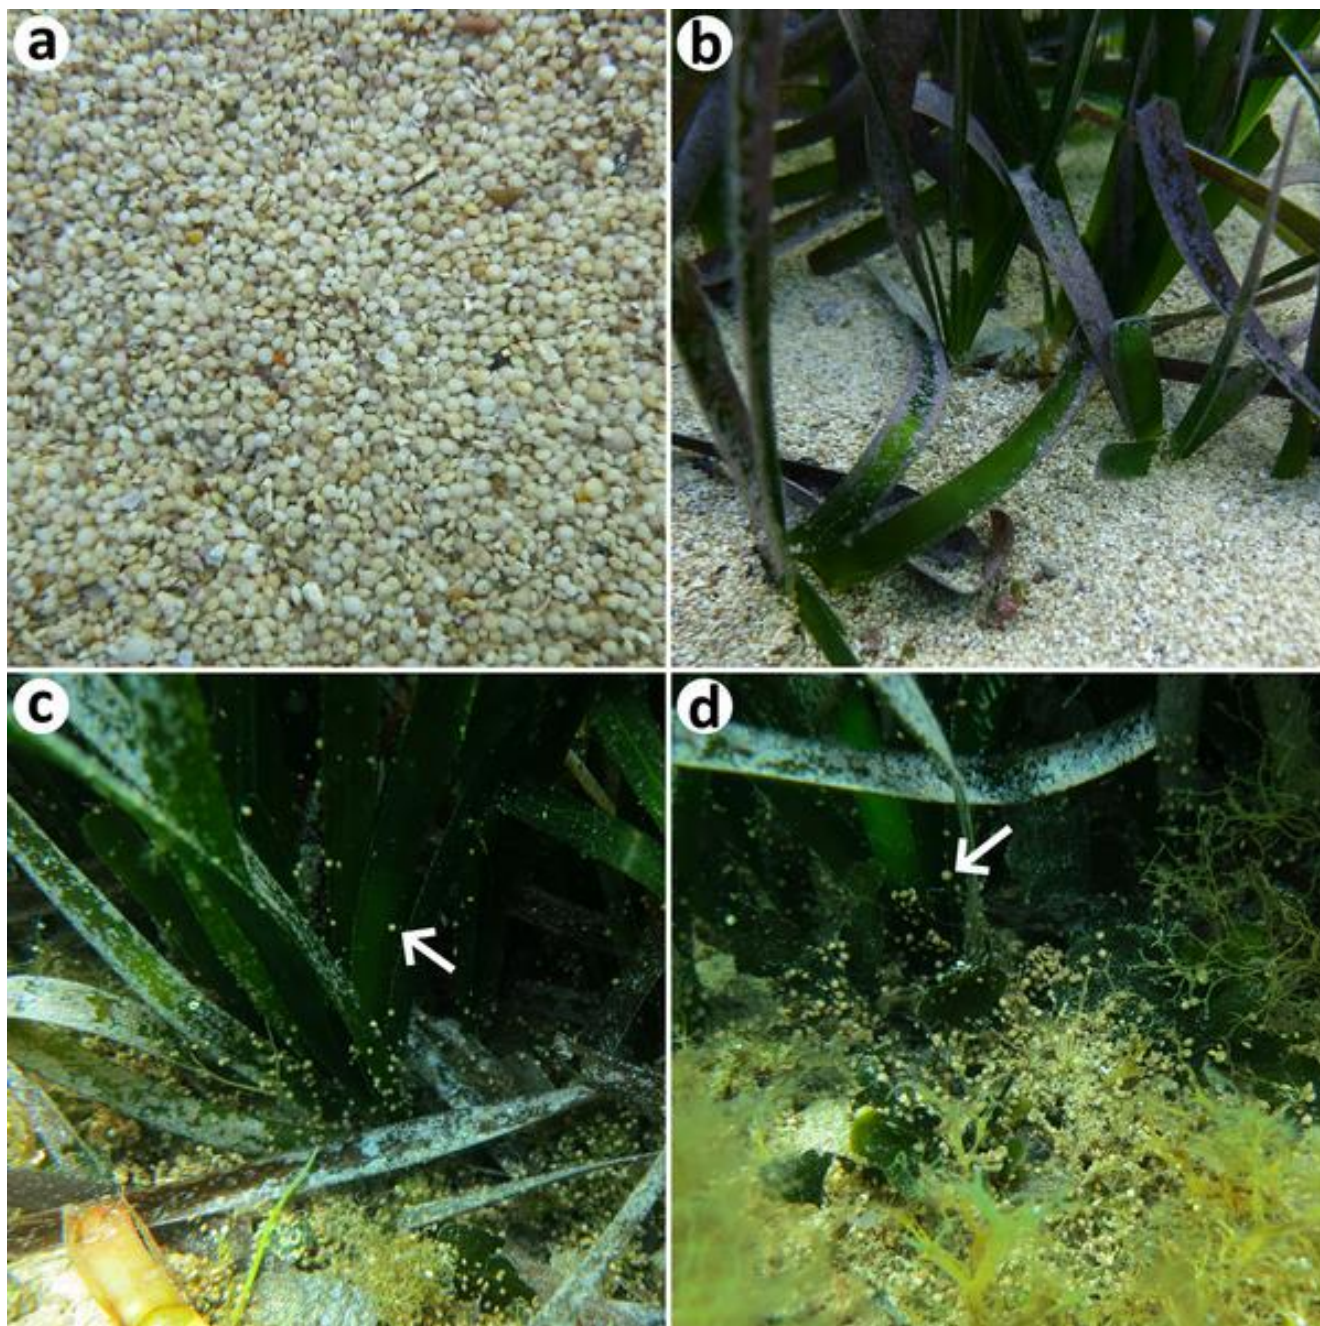

575

**Figure 2: Substrate and epiphytic communities of *Amphistegina lobifera* investigated in this study.**

(a) in situ view of the investigated seabed substrate containing numerous *A. lobifera* specimens; (b) leaves of the seagrass *Posidonia oceanica* being buried in the substrate containing numerous *A. lobifera* specimens; (c), (d) epiphytic specimens of *A. lobifera* occurring on the leaves of *P. oceanica* (arrows) and the surrounding seaweeds. All photos taken by Martin Vohník.

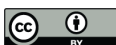

580

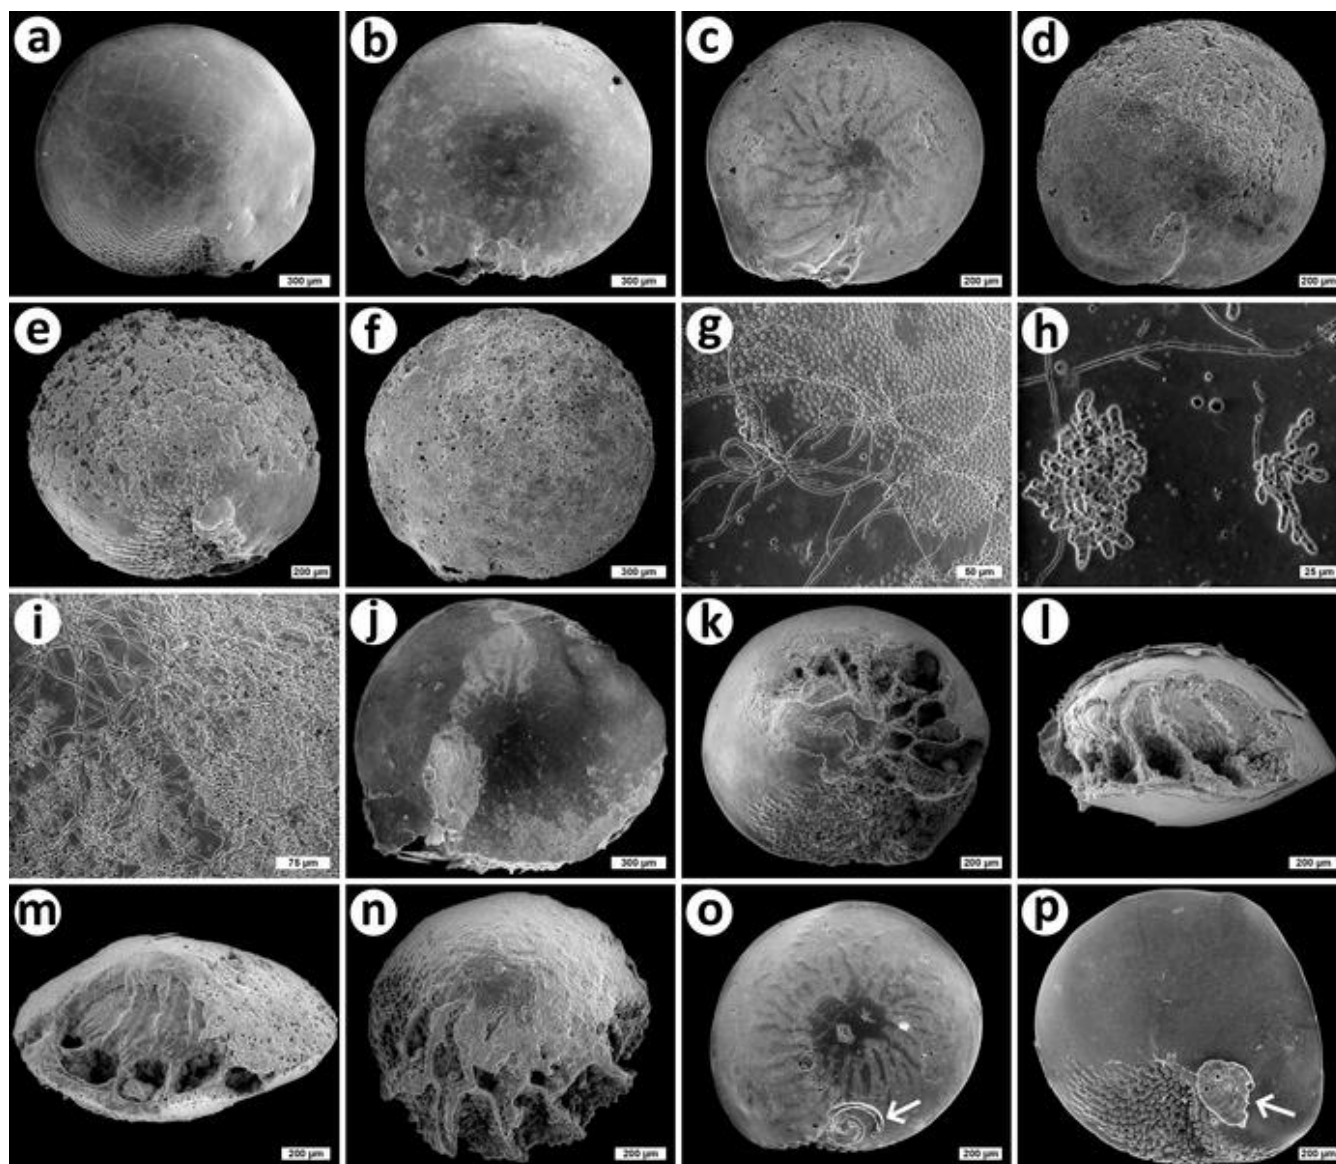

**Figure 3: Examples of bioerosion, abiotic dissolution and epiphytic colonization of shells of the invasive foraminiferan *Amphistegina lobifera* visualized by scanning electron photography.**

*Amphistegina lobifera* substrate shells displaying low (a), medium (b, c) and high (d, e, f) levels of bioerosion (cf. Table 1); (g), (h), (i) typical bioerosion traces found in the substrate shells; (j – n) various degrees of abiotic dissolution, sometimes combined with bioerosion (j, m, n); (o), (p) examples of epiphytes on *A. lobifera* shells (arrows). Bars 300 μm (a, b, f, j), 200 μm (c, d, e, k – p), 75 μm (i), 50 μm (g) and 25 μm (h). The shells collected by Martin Vohník, all photos taken by Jiří Macháč under Martin Vohník's supervision.

585

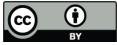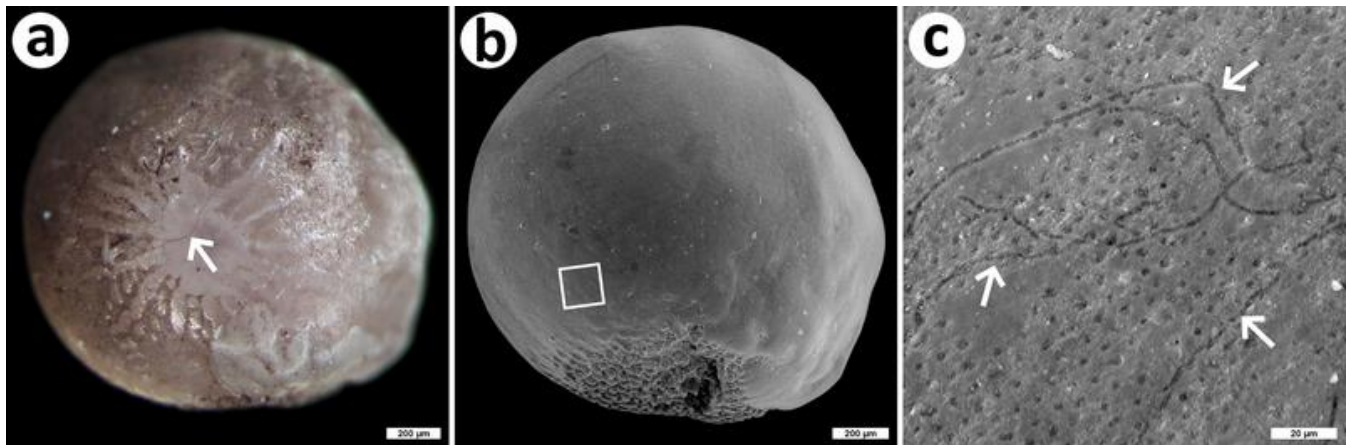

590

**Figure 4: An example of fungal colonization of a shell of the invasive foraminiferan *Amphistegina lobifera*.**

(a) dorsal view of an *A. lobifera* shell apparently colonized by dark brown mycelium (arrow), stereomicroscopy, bar = 200 μm; (b) ventral view of the same shell as in (a), SEM, bar = 200 μm, the square delimits the area magnified in (c) and displaying fungal traces on the surface (arrows), SEM, bar = 20 μm. The shell collected by Martin Vohník, photos taken by Martin Vohník

595

(a) and Jiří Machač under Martin Vohník's supervision (b, c).

600

605

610

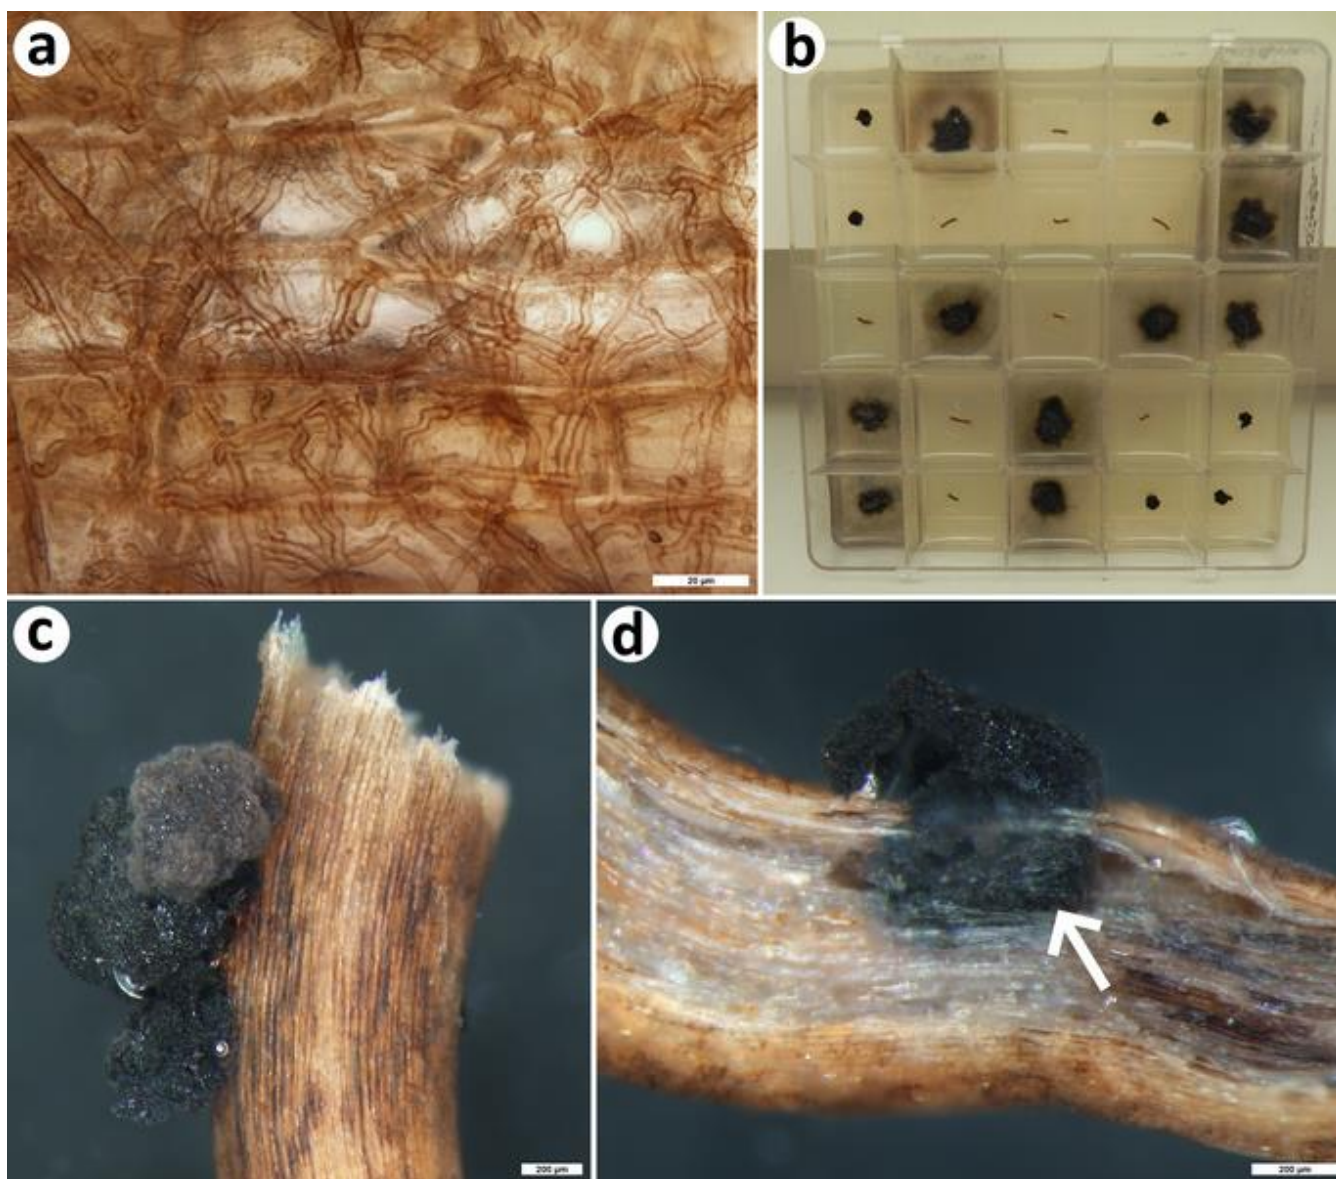

615

620

**Figure 5: Colonization pattern and root mycobionts of the dominant Mediterranean seagrass *Posidonia oceanica*.**

(a) the typical colonization pattern in the seagrass roots that resembles the ubiquitous terrestrial dark septate endophytes; (b) 25-compartment plastic Petri dish filled with nutrient medium and with fungal colonies emerging from some of the surface-sterilized seagrass root segments. Note that one morphotype produces diffuse substrate mycelium (it corresponds to MOTU #14 = the *Lulworthiales* sp. MV-2018, see Table 3), while the other remains small and limited to the surface of the root segments or their immediate vicinity (MOTU #13 = *Posidoniomyces atricolor*). In this particular case, 9 root segments did not yield any fungal mycelium, i.e., the isolation success reached 64%. (c) detail of



compact colonies of *P. atricolor* emerging from a surface-sterilized root segment, SEM, bar = 200  $\mu\text{m}$ ; (d) longitudinal section through a root segment yielding a compact colony of *P. atricolor*, note that the surface mycelium originates from an enlarged intraradical sclerotium (arrow), SEM, bar = 200  $\mu\text{m}$ . All photos taken by Martin Vohník.

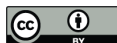

**Table 1: Bioerosion, abiotic dissolution, macroepiphytic colonization and mechanical damage of *Amphistegina lobifera* shells in numbers.**

Epiphytic and substrate shells of the invasive foraminiferan *A. lobifera* were collected at three different microsites at a depth of ca. 6 m at Balluta Bay, St. Julian's, Malta, for details on their investigation see Materials and Methods.

| Microsite #         | Type of shells (n = 30) | Categories of shell bioerosion/abiotic dissolution |                             |                                    |                         |                            |                          | Shells with macro-epiphytes | Mechanically damaged shells |
|---------------------|-------------------------|----------------------------------------------------|-----------------------------|------------------------------------|-------------------------|----------------------------|--------------------------|-----------------------------|-----------------------------|
|                     |                         | 1: Intact (not affected)                           | 2: Only partially dissolved | 3: Bioeroded + partially dissolved | 4: Only bioeroded - low | 5: Only bioeroded - medium | 6: Only bioeroded - high |                             |                             |
| 1                   | Epiphytic               | 20                                                 | 0                           | 1                                  | 4                       | 3                          | 2                        | 1                           | 2                           |
|                     | Substrate               | 8                                                  | 3                           | 5                                  | 8                       | 2                          | 4                        | 1                           | 5                           |
| 2                   | Epiphytic               | 27                                                 | 1                           | 1                                  | 0                       | 0                          | 1                        | 1                           | 0                           |
|                     | Substrate               | 5                                                  | 2                           | 4                                  | 6                       | 6                          | 7                        | 2                           | 3                           |
| 3                   | Epiphytic               | 25                                                 | 1                           | 0                                  | 2                       | 2                          | 0                        | 1                           | 0                           |
|                     | Substrate               | 6                                                  | 2                           | 5                                  | 14                      | 2                          | 1                        | 2                           | 0                           |
| Average (all sites) | Epiphytic               | 80%                                                | 2%                          | 2%                                 | 7%                      | 6%                         | 3%                       | 4%                          | 2%                          |
|                     | Substrate               | 21%                                                | 8%                          | 16%                                | 31%                     | 11%                        | 13%                      | 3%                          | 9%                          |





**Table 2: Results of mycobiont isolation from shells of the foram *Amphistegina lobifera* and roots of the seagrass *Posidonia oceanica*.**  
 The mycobionts were isolated into pure cultures and the Molecular Operational Taxonomic Units (MOTUs) were delimited as described in Materials and Methods.

<sup>1</sup> data only for non-sterilized substrate shells (surface-sterilized substrate shells yielded no isolate)

| Sample type                                         | Microsite #1                   |                                 | Microsite #2                    |                        | Microsite #3                   |                            |
|-----------------------------------------------------|--------------------------------|---------------------------------|---------------------------------|------------------------|--------------------------------|----------------------------|
|                                                     | 8 isolates<br>(6 identified)   | 6 MOTUs<br>(#1, 5, 6, 8, 9, 11) | 4 isolates<br>(all identified)  | 3 MOTUs<br>(#1, 7, 12) | 7 isolates<br>(6 identified)   | 4 MOTUs<br>(# 2, 3, 4, 10) |
| <i>A. lobifera</i><br>epiphytic shells              | 0 isolates                     | -                               | 2 isolates<br>(0 identified)    | -                      | 0 isolates                     | -                          |
| <i>A. lobifera</i><br>substrate shells <sup>1</sup> | 19 isolates<br>(17 identified) | 1 MOTU<br>(# 13)                | 29 isolates<br>(all identified) | 1 MOTU<br>(# 13)       | 38 isolates<br>(35 identified) | 2 MOTUs<br>(# 13, 14)      |



**Table 3: Taxonomic affinities of the Molecular Operational Taxonomic Units representing mycobionts isolated in this study.**

Taxonomic affinities (identity) of the delimited Molecular Operational Taxonomic Units (MOTUs) are based on comparing representative ITS and/or LSU rDNA sequences with those available in a public database as described in Materials and Methods.

<sup>1</sup> EPI = epiphytic shells of the foram *Amphistegina lobifera*, POS = terminal roots of the seagrass *Posidonia oceanica*. The numbers after the codes (i.e., 1, 2 and 3) represent the three sampling microsites (see Table 1).

| MOTU # | MOTU occurrence (no. of identified isolates) <sup>1</sup> | MOTU identity                     | Reference isolates [sequences in GenBank] |
|--------|-----------------------------------------------------------|-----------------------------------|-------------------------------------------|
| 1      | EPI-1 (1), EPI-2 (2)                                      | <i>Penicillium</i> sp. MV-2018A   | MLT-5 [MT636974 (ITS)]                    |
| 2      | EPI-3 (2)                                                 | <i>Penicillium</i> sp. MV-2018B   | MLT-56 [MT636983 (ITS)]                   |
| 3      | EPI-3 (1)                                                 | <i>Penicillium</i> sp. MV-2018C   | MLT-55 [MT636982 (ITS)]                   |
| 4      | EPI-3 (2)                                                 | <i>Penicillium</i> sp. MV-2018D   | MLT-51 [MT636980 (ITS)]                   |
| 5      | EPI-1 (1)                                                 | <i>Kauffia</i> sp. MV-2018        | MLT-8 [MT636977 (ITS), MT636937 (LSU)]    |
| 6      | EPI-1 (1)                                                 | <i>Dothideomyces</i> sp. MV-2018A | MLT-7 [MT636976 (ITS)]                    |
| 7      | EPI-2 (1)                                                 | <i>Alternaria</i> sp. MV-2018     | MLT-28 [MT636979 (ITS), MT636939 (LSU)]   |
| 8      | EPI-1 (1)                                                 | <i>Dothideomyces</i> sp. MV-2018B | MLT-4 [MT636973 (ITS), MT636936 (LSU)]    |
| 9      | EPI-1 (1)                                                 | <i>Sordariomyces</i> sp. MV-2018A | MLT-6 [MT636975 (ITS)]                    |
| 10     | EPI-3 (1)                                                 | <i>Sordariomyces</i> sp. MV-2018B | MLT-52 [MT636981 (ITS), MT636940 (LSU)]   |
| 11     | EPI-1 (1)                                                 | <i>Cladosporium</i> sp. MV-2018A  | MLT-3 [MT636972 (ITS), MT636935 (LSU)]    |
| 12     | EPI-2 (1)                                                 | <i>Cladosporium</i> sp. MV-2018B  | MLT-27 [MT636978 (ITS), MT636938 (LSU)]   |
| 13     | POS-1 (17), POS-2 (29), POS-3 (21)                        | <i>Posidonionomyces atricolor</i> | MLT-87 [MT636984 (ITS)]                   |
| 14     | POS-3 (14)                                                | <i>Lulworthiales</i> sp. MV-2018  | MLT-72 [MT636941 (LSU)]                   |
